# Supplementary material
Source: PubMed Central journal article supplement (PMC3085110)
Supplement: NIHMS260689-supplement-01.pdf [file NIHMS260689-supplement-01.pdf]

## Supplementary table 1.

A detailed list of TIR domain-containing proteins in bacteria.

| Species Name                                               | Quantity | Gi Number                                                                                           | Taxonomy Id |
|------------------------------------------------------------|----------|-----------------------------------------------------------------------------------------------------|-------------|
| <i>Acaryochloris marina</i> MBIC11017                      | 10       | 158333903,158335132,158335320,158335656,158335901,158337429,158338098,158338261,158341339,158341564 | 329726      |
| <i>Acidobacteria bacterium</i> Ellin345                    | 2        | 94970501,94971286                                                                                   | 204669      |
| <i>Acidovorax avenae</i> subsp. <i>citrulli</i> AAC00-1    | 1        | 120609226                                                                                           | 397945      |
| <i>Acidovorax</i> sp. JS42                                 | 3        | 121594563,121594965,121594971                                                                       | 232721      |
| <i>Acinetobacter</i> sp. ADP1                              | 1        | 50086248                                                                                            | 62977       |
| <i>Actinobacillus pleuropneumoniae</i> serovar 1 str. 4074 | 1        | 53729072                                                                                            | 228399      |
| <i>Agrobacterium tumefaciens</i>                           | 1        | 10955119                                                                                            | 358         |
| <i>Algoriphagus</i> sp. PR1                                | 3        | 126648330,126648357,126648781                                                                       | 388413      |
| <i>Alteromonadales bacterium</i> TW-7                      | 2        | 119472125,119472278                                                                                 | 156578      |
| <i>Anabaena variabilis</i> ATCC 29413                      | 3        | 75910019,75910020,75910382                                                                          | 240292      |
| <i>Anaeromyxobacter</i> sp. Fw109-5                        | 2        | 153006835,153006836                                                                                 | 404589      |
| <i>Anaerotruncus colihominis</i> DSM 17241                 | 1        | 167771152                                                                                           | 445972      |
| <i>Arthrobacter chlorophenolicus</i> A6                    | 1        | 169174118                                                                                           | 452863      |
| <i>Arthrobacter nitroguajacolicus</i>                      | 1        | 146351247                                                                                           | 211146      |
| <i>Aurantimonas</i> sp. SI85-9A1                           | 1        | 90420036                                                                                            | 314269      |
| <i>Azoarcus</i> sp. BH72                                   | 4        | 119897555,119898857,119898888,11989914                                                              | 62928       |
| <i>Bacillus cereus</i> AH187                               | 1        | 166980602                                                                                           | 405534      |
| <i>Bacillus cereus</i> AH820                               | 1        | 166997552                                                                                           | 405535      |
| <i>Bacillus cereus</i> G9842                               | 1        | 168142494                                                                                           | 405531      |
| <i>Bacillus licheniformis</i> ATCC 14580                   | 1        | 52080622                                                                                            | 279010      |
| <i>Bacillus subtilis</i> subsp. <i>subtilis</i> str. 168   | 1        | 16077567                                                                                            | 224308      |
| <i>bacterium</i> Ellin514                                  | 3        | 186456604,186457644,186460978                                                                       | 320771      |
| <i>Bacteroides ovatus</i> ATCC 8483                        | 4        | 160882635,160883125,160887045,160887046                                                             | 411476      |
| <i>Bacteroides thetaiotaomicron</i> VPI-5482               | 2        | 29348412,29348810                                                                                   | 226186      |
| <i>Bacteroides uniformis</i> ATCC 8492                     | 1        | 160888318                                                                                           | 411479      |
| <i>Bacteroides vulgatus</i> ATCC 8482                      | 1        | 150006151                                                                                           | 435590      |
| <i>Beggiatoa</i> sp. PS                                    | 2        | 153869313,153871845                                                                                 | 422289      |
| <i>Beijerinckia indica</i> subsp. <i>indica</i> ATCC 9039  | 3        | 182676913,182676914,182678743                                                                       | 395963      |
| <i>Bordetella bronchiseptica</i> RB50                      | 1        | 33599474                                                                                            | 257310      |
| <i>Bradyrhizobium</i> sp. BTAi1                            | 4        | 148240889,148240894,148254643,148254944                                                             | 288000      |
| <i>Bradyrhizobium</i> sp. ORS278                           | 1        | 146339216                                                                                           | 114615      |
| <i>Brucella abortus</i> bv. 1 str. 9-941                   | 1        | 62289692                                                                                            | 262698      |

|                                                 |   |                                                             |        |
|-------------------------------------------------|---|-------------------------------------------------------------|--------|
| <i>Brucella abortus</i> S19                     | 1 | 189023503                                                   | 430066 |
| <i>Brucella melitensis</i> 16M                  | 2 | 17987499,17987957                                           | 224914 |
| <i>Brucella melitensis</i> biovar Abortus 2308  | 1 | 82699179                                                    | 359391 |
| <i>Brucella ovis</i> ATCC 25840                 | 2 | 148559127,148559442                                         | 444178 |
| <i>Brucella suis</i> 1330                       | 1 | 23501622                                                    | 204722 |
| <i>Brucella suis</i> ATCC 23445                 | 1 | 163842531                                                   | 470137 |
| <i>Burkholderia ambifaria</i> MC40-6            | 1 | 172063457                                                   | 398577 |
| <i>Burkholderia multivorans</i> ATCC 17616      | 1 | 161524091                                                   | 395019 |
| <i>Burkholderia pseudomallei</i> DM98           | 1 | 167717459                                                   | 441161 |
| <i>Burkholderia thailandensis</i> E264          | 1 | 83720538                                                    | 271848 |
| <i>Burkholderia xenovorans</i> LB400            | 1 | 91781261                                                    | 266265 |
| <i>Campylobacter coli</i> RM2228                | 1 | 57504994                                                    | 306254 |
| <i>Caulobacter crescentus</i> CB15              | 1 | 16125662                                                    | 190650 |
| <i>Caulobacter</i> sp. K31                      | 1 | 167647765                                                   | 366602 |
| <i>Chlorobaculum parvum</i> NCIB 8327           | 4 | 193211967,193212322,193212749,193213051                     | 517417 |
| <i>Chlorobium ferrooxidans</i> DSM 13031        | 1 | 110597354                                                   | 377431 |
| <i>Chlorobium limicola</i> DSM 245              | 2 | 189346112,189346983                                         | 290315 |
| <i>Chlorobium phaeobacteroides</i> BS1          | 1 | 189501384                                                   | 331678 |
| <i>Chlorobium phaeobacteroides</i> DSM 266      | 6 | 119356007,119356119,119356671,119356721,119356730,119357110 | 290317 |
| <i>Chlorobium tepidum</i> TLS                   | 2 | 21673871,21674286                                           | 194439 |
| <i>Chloroflexus aurantiacus</i> J-10-fl         | 1 | 163848015                                                   | 324602 |
| <i>Chloroherpeton thalassium</i> ATCC 35110     | 2 | 193215022,193215915                                         | 517418 |
| <i>Clostridium beijerinckii</i> NCIMB 8052      | 2 | 150017657,150017658                                         | 290402 |
| <i>Clostridium boltea</i> ATCC BAA-613          | 2 | 160936295,160940648                                         | 411902 |
| <i>Clostridium botulinum</i> B str. Eklund 17B  | 1 | 187935016                                                   | 508765 |
| <i>Clostridium butyricum</i> 5521               | 2 | 182418236,182418248                                         | 447214 |
| <i>Clostridium novyi</i> NT                     | 1 | 118443757                                                   | 386415 |
| <i>Clostridium perfringens</i> B str. ATCC 3626 | 1 | 168210190                                                   | 451754 |
| <i>Clostridium perfringens</i> C str. JGS1495   | 2 | 169342429,169344357                                         | 445334 |
| <i>Clostridium perfringens</i> E str. JGS1987   | 1 | 168204813                                                   | 451755 |
| <i>Clostridium scindens</i> ATCC 35704          | 1 | 167759769                                                   | 411468 |
| <i>Clostridium spiroforme</i> DSM 1552          | 1 | 169350767                                                   | 428126 |
| <i>Clostridium thermocellum</i> ATCC 27405      | 2 | 125973650,125973959                                         | 203119 |
| <i>Colwellia psychrelythraea</i> 34H            | 2 | 71278055,71278712                                           | 167879 |
| <i>Congregibacter litoralis</i> KT71            | 1 | 88706565                                                    | 314285 |
| <i>Coprococcus eutactus</i> ATCC 27759          | 2 | 163816538,163816550                                         | 411474 |
| <i>Cyanothecce</i> sp. ATCC 51142               | 1 | 172035010                                                   | 43989  |

|                                                                     |    |                                                                                                                                                                                                                                                           |        |
|---------------------------------------------------------------------|----|-----------------------------------------------------------------------------------------------------------------------------------------------------------------------------------------------------------------------------------------------------------|--------|
| <i>Cyanothece</i> sp. PCC 7424                                      | 17 | 186898775,186899312,186899355,186900266,186900303,186900530,186900824,186902869,186902894,186902954,186902955,186903249,186903250,186904237,186904241,186904243,186908547                                                                                 | 65393  |
| <i>Cyanothece</i> sp. PCC 8801                                      | 10 | 177663917,177664020,177664157,177664433,177664659,177664796,177665979,177666219,177666329,177667146                                                                                                                                                       | 41431  |
| <i>Dechloromonas aromatica</i> RCB                                  | 3  | 71907829,71908554,71909212                                                                                                                                                                                                                                | 159087 |
| <i>Desulfatibacillum alkenivorans</i> AK-01                         | 2  | 163725356,163727072                                                                                                                                                                                                                                       | 439235 |
| <i>Desulfitobacterium hafniense</i> DCB-2                           | 1  | 109648169                                                                                                                                                                                                                                                 | 272564 |
| <i>Desulfitobacterium hafniense</i> Y51                             | 2  | 89895600,89897330                                                                                                                                                                                                                                         | 138119 |
| <i>Desulfococcus oleovorans</i> Hxd3                                | 2  | 158521636,158523057                                                                                                                                                                                                                                       | 96561  |
| <i>Desulfuromonas acetoxidans</i> DSM 684                           | 1  | 95930804                                                                                                                                                                                                                                                  | 281689 |
| <i>Dorea formicigenerans</i> ATCC 27755                             | 1  | 166032274                                                                                                                                                                                                                                                 | 411461 |
| <i>Dorea longicatena</i> DSM 13814                                  | 1  | 153855947                                                                                                                                                                                                                                                 | 411462 |
| <i>Endoriftia persephone</i> 'Hot96_1+Hot96_2'                      | 1  | 167945761                                                                                                                                                                                                                                                 | 394104 |
| <i>Enterococcus faecalis</i> V583                                   | 1  | 29376482                                                                                                                                                                                                                                                  | 226185 |
| <i>Erythrobacter litoralis</i> HTCC2594                             | 1  | 85372881                                                                                                                                                                                                                                                  | 314225 |
| <i>Erythrobacter</i> sp. NAP1                                       | 3  | 85707656,85709002,85710694                                                                                                                                                                                                                                | 237727 |
| <i>Erythrobacter</i> sp. SD-21                                      | 3  | 149184234,149185058,149185602                                                                                                                                                                                                                             | 161528 |
| <i>Escherichia coli</i> 536                                         | 1  | 110642087                                                                                                                                                                                                                                                 | 362663 |
| <i>Escherichia coli</i> CFT073                                      | 1  | 26248250                                                                                                                                                                                                                                                  | 199310 |
| <i>Eubacterium siraeum</i> DSM 15702                                | 2  | 167749528,167750070                                                                                                                                                                                                                                       | 428128 |
| <i>Faecalibacterium prausnitzii</i> M21/2                           | 1  | 160943499                                                                                                                                                                                                                                                 | 411485 |
| <i>Flavobacteria bacterium</i> BBFL7                                | 1  | 89891342                                                                                                                                                                                                                                                  | 156586 |
| <i>Flavobacteriales bacterium</i> ALC-1                             | 1  | 163788951                                                                                                                                                                                                                                                 | 391603 |
| <i>Frankia alni</i> ACN14a                                          | 25 | 111219610,111219960,111220054,111220117,111220275,111220641,111221197,111221198,111221275,111221750,111221751,111221776,111222749,111223306,111223345,111223360,111223390,111223545,111224110,111224384,111224404,111224682,111224864,111224872,111224927 | 326424 |
| <i>Frankia</i> sp. Ccl3                                             | 10 | 86738803,86738992,86739589,86740215,86740216,86740655,86741681,86742122,86742132,86742863                                                                                                                                                                 | 106370 |
| <i>Frankia</i> sp. EAN1pec                                          | 24 | 158313324,158313711,158314149,158314285,158314575,158315148,158315241,158315321,158315434,158316028,158316033,158316034,158316041,158317093,158317472,158317473,158318093,158318116,158318117,158318124,158318483,158318512,158318516,158318619           | 298653 |
| <i>Fusobacterium nucleatum</i> subsp. <i>nucleatum</i> ATCC 25586   | 1  | 19704057                                                                                                                                                                                                                                                  | 190304 |
| <i>Fusobacterium nucleatum</i> subsp. <i>polymorphum</i> ATCC 10953 | 1  | 167007634                                                                                                                                                                                                                                                 | 393480 |
| <i>Fusobacterium nucleatum</i> subsp. <i>vincentii</i> ATCC 49256   | 1  | 34762589                                                                                                                                                                                                                                                  | 209882 |
| <i>Gemmata obscuriglobus</i> UQM 2246                               | 1  | 168702708                                                                                                                                                                                                                                                 | 214688 |

|                                                                        |   |                                                             |        |
|------------------------------------------------------------------------|---|-------------------------------------------------------------|--------|
| <i>Geobacter lovleyi</i> SZ                                            | 3 | 189423147,189423350,189423352                               | 398767 |
| <i>Geobacter metallireducens</i> GS-15                                 | 4 | 78222411,78222415,78223002,78224197                         | 269799 |
| <i>Geobacter</i> sp. FRC-32                                            | 2 | 110601028,110601039                                         | 316067 |
| <i>Geobacter sulfurreducens</i> PCA                                    | 2 | 39995660,39997687                                           | 243231 |
| <i>Geobacter uranii</i> reducens Rf4                                   | 2 | 148263900,148264783                                         | 351605 |
| <i>Gloeobacter violaceus</i> PCC 7421                                  | 1 | 37523598                                                    | 251221 |
| <i>Gluconacetobacter diazotrophicus</i> PAI 5                          | 1 | 162145848                                                   | 272568 |
| <i>Hermiimonas arsenicoxydans</i>                                      | 1 | 193222319                                                   | 204773 |
| <i>Hydrogenivirga</i> sp. 128-5-R1-1                                   | 1 | 163783407                                                   | 392423 |
| <i>Hyphomonas neptunium</i> ATCC 15444                                 | 1 | 114800256                                                   | 228405 |
| <i>Janthinobacterium</i> sp. Marseille                                 | 1 | 152983394                                                   | 375286 |
| <i>Kordia algicida</i> OT-1                                            | 1 | 163754122                                                   | 391587 |
| <i>Leptothrix cholodnii</i> SP-6                                       | 3 | 171058491,171059860,171060478                               | 395495 |
| <i>Leuconostoc mesenteroides</i> subsp. <i>mesenteroides</i> ATCC 8293 | 1 | 116618176                                                   | 203120 |
| <i>Limnobacter</i> sp. MED105                                          | 2 | 149928326,149928502                                         | 391597 |
| <i>Lyngbya</i> sp. PCC 8106                                            | 1 | 119487330                                                   | 313612 |
| <i>Magnetospirillum magneticum</i> AMB-1                               | 1 | 83312508                                                    | 342108 |
| <i>Maricaulis maris</i> MCS10                                          | 1 | 114571182                                                   | 394221 |
| <i>marine gamma proteobacterium</i> HTCC2080                           | 1 | 119504025                                                   | 247639 |
| <i>Marinobacter algicola</i> DG893                                     | 1 | 149377411                                                   | 443152 |
| <i>Marinobacter aquaeolei</i> VT8                                      | 1 | 120554189                                                   | 351348 |
| <i>Marinomonas</i> sp. MED121                                          | 1 | 87120129                                                    | 314277 |
| <i>Mariprofundus ferrooxydans</i> PV-1                                 | 2 | 114777072,114778590                                         | 314345 |
| <i>Mesorhizobium loti</i>                                              | 1 | 20803972                                                    | 381    |
| <i>Methylobacterium chloromethanicum</i> CM4                           | 6 | 156451578,156451579,156451644,15645161,156451664,156451741  | 440085 |
| <i>Methylobacterium extorquens</i> PA1                                 | 1 | 163851347                                                   | 419610 |
| <i>Methylobacterium nodulans</i> ORS 2060                              | 2 | 163702122,163708277                                         | 460265 |
| <i>Methylobacterium populi</i> BJ001                                   | 1 | 188579372                                                   | 441620 |
| <i>Methylococcus capsulatus</i> str. Bath                              | 1 | 53802899                                                    | 243233 |
| <i>Microcystis aeruginosa</i> NIES-843                                 | 6 | 166363533,166364872,166364873,166366472,166368365,166368885 | 449447 |
| <i>Microcystis aeruginosa</i> PCC 7806                                 | 5 | 159026969,159029511,159029512,159029883,159030587           | 267872 |
| <i>Moritella</i> sp. PE36                                              | 1 | 149907700                                                   | 58051  |
| <i>Mycobacterium gilvum</i> PYR-GCK                                    | 1 | 145224874                                                   | 350054 |
| <i>Mycobacterium</i> sp. MCS                                           | 1 | 108798443                                                   | 164756 |
| <i>Nitrobacter hamburgensis</i> X14                                    | 1 | 92117623                                                    | 323097 |
| <i>Nitrobacter winogradskyi</i> Nb-255                                 | 1 | 75674455                                                    | 323098 |
| <i>Nitrococcus mobilis</i> Nb-231                                      | 1 | 88811546                                                    | 314278 |
| <i>Nitrosococcus oceani</i> ATCC 19707                                 | 1 | 77163540                                                    | 323261 |
| <i>Nitrosospira multiformis</i> ATCC 25196                             | 1 | 82703380                                                    | 323848 |

|                                                       |    |                                                                                                               |        |
|-------------------------------------------------------|----|---------------------------------------------------------------------------------------------------------------|--------|
| <i>Nocardiooides</i> sp. JS614                        | 1  | 119717788                                                                                                     | 196162 |
| <i>Nodularia spumigena</i> CCY 9414                   | 4  | 119509708,119510816,119511438,119512412                                                                       | 313624 |
| <i>Nostoc punctiforme</i> PCC 73102                   | 11 | 186681165,186681166,186681323,186681341,186681684,186682319,186683142,186685782,186686076,186686611,186686618 | 63737  |
| <i>Nostoc</i> sp. PCC 7120                            | 2  | 17229067,17229450                                                                                             | 103690 |
| <i>Oligotropha carboxidovorans</i> OM5                | 1  | 170789713                                                                                                     | 504832 |
| <i>Opitutus terrae</i> PB90-1                         | 2  | 182412358,182416269                                                                                           | 452637 |
| <i>Paracoccus denitrificans</i> PD1222                | 1  | 69937734                                                                                                      | 318586 |
| <i>Parvibaculum lavamentivorans</i> DS-1              | 1  | 154251427                                                                                                     | 402881 |
| <i>Pelobacter carbinolicus</i> DSM 2380               | 2  | 77920508,116878644                                                                                            | 338963 |
| <i>Planctomyces maris</i> DSM 8797                    | 3  | 149173909,149177199,149179443                                                                                 | 344747 |
| <i>Plesiocystis pacifica</i> SIR-1                    | 2  | 149921194,149923599                                                                                           | 391625 |
| <i>Polaromonas</i> sp. JS666                          | 3  | 91790569,91790571,91791178                                                                                    | 296591 |
| <i>Porphyromonas gingivalis</i> ATCC 33277            | 1  | 188995660                                                                                                     | 431947 |
| <i>Porphyromonas gingivalis</i> W83                   | 2  | 34540210,34541475                                                                                             | 242619 |
| <i>Pseudoalteromonas tunicata</i> D2                  | 1  | 88858979                                                                                                      | 87626  |
| <i>Pseudomonas aeruginosa</i> PA7                     | 1  | 152988748                                                                                                     | 381754 |
| <i>Pseudomonas putida</i> W619                        | 1  | 170722523                                                                                                     | 390235 |
| <i>Pseudomonas syringae</i> pv. <i>syringae</i> B728a | 1  | 66043375                                                                                                      | 205918 |
| <i>Psychroflexus torquis</i> ATCC 700755              | 2  | 91217324,91218536                                                                                             | 313595 |
| <i>Reinekea</i> sp. MED297                            | 1  | 88799612                                                                                                      | 314283 |
| <i>Rhizobium etli</i> CIAT 652                        | 1  | 190894000                                                                                                     | 491916 |
| <i>Rhizobium</i> sp. NGR234                           | 2  | 16519676,16519836                                                                                             | 394    |
| <i>Rhodobacter sphaeroides</i> 2.4.1                  | 1  | 77465545                                                                                                      | 272943 |
| <i>Rhodobacter sphaeroides</i> ATCC 17025             | 1  | 146280358                                                                                                     | 349102 |
| <i>Rhodococcus</i> sp. RHA1                           | 4  | 111025898,111025900,111025901,111025905                                                                       | 101510 |
| <i>Rhodoferax ferrireducens</i> T118                  | 3  | 89899866,89899868,89900025                                                                                    | 338969 |
| <i>Rhodopirellula baltica</i> SH 1                    | 4  | 32472902,32472907,32476320,32476921                                                                           | 243090 |
| <i>Rhodopseudomonas palustris</i> BisA53              | 1  | 115524812                                                                                                     | 316055 |
| <i>Rhodopseudomonas palustris</i> BisB18              | 1  | 90424156                                                                                                      | 316056 |
| <i>Rhodopseudomonas palustris</i> BisB5               | 1  | 91978097                                                                                                      | 316057 |
| <i>Rhodopseudomonas palustris</i> CGA009              | 1  | 39934665                                                                                                      | 258594 |
| <i>Rhodopseudomonas palustris</i> HaA2                | 1  | 86749749                                                                                                      | 316058 |
| <i>Rhodospirillum rubrum</i> ATCC 11170               | 1  | 83592173                                                                                                      | 269796 |
| <i>Robiginitalea biformata</i> HTCC2501               | 1  | 88804082                                                                                                      | 313596 |
| <i>Roseovarius nubinhibens</i> ISM                    | 1  | 83950960                                                                                                      | 89187  |
| <i>Saccharophagus degradans</i> 2-40                  | 1  | 90023560                                                                                                      | 203122 |
| <i>Saccharopolyspora erythraea</i> NRRL 2338          | 1  | 134099913                                                                                                     | 405948 |
| <i>Salinispora arenicola</i> CNS-205                  | 2  | 159038226,159038227                                                                                           | 391037 |

|                                                                                             |    |                                                                                                     |        |
|---------------------------------------------------------------------------------------------|----|-----------------------------------------------------------------------------------------------------|--------|
| <i>Salmonella enterica</i> subsp. <i>enterica</i><br>serovar <i>Agona</i> str. <i>SL483</i> | 1  | 168219791                                                                                           | 454166 |
| <i>Salmonella enterica</i> subsp. <i>enterica</i><br>serovar <i>Dublin</i> str.             | 1  | 167560111                                                                                           | 439851 |
| <i>Salmonella enterica</i> subsp. <i>enterica</i><br>serovar <i>Schwarzengrund</i> str.     | 1  | 167982220                                                                                           | 439843 |
| <i>Shewanella baltica</i> OS223                                                             | 1  | 149115100                                                                                           | 407976 |
| <i>Shewanella denitrificans</i> OS217                                                       | 2  | 91794923,91794925                                                                                   | 318161 |
| <i>Shewanella pealeana</i> ATCC 700345                                                      | 2  | 157961878,157961881                                                                                 | 398579 |
| <i>Shewanella putrefaciens</i> 200                                                          | 1  | 124545219                                                                                           | 399804 |
| <i>Shewanella sediminis</i> HAW-EB3                                                         | 1  | 157376880                                                                                           | 425104 |
| <i>Shewanella</i> sp. <i>MR-7</i>                                                           | 2  | 114046539,114047355                                                                                 | 60481  |
| <i>Shewanella woodyi</i> ATCC 51908                                                         | 1  | 170728949                                                                                           | 392500 |
| <i>Sinorhizobium medicae</i> WSM419                                                         | 1  | 150378393                                                                                           | 366394 |
| <i>Solibacter usitatus</i> Ellin6076                                                        | 6  | 116620737,116623992,116624951,116625512,116626041,116626738                                         | 234267 |
| <i>Sorangium cellulosum</i> 'So ce 56'                                                      | 10 | 162448499,162449191,162450065,162451481,162451482,162451823,162451903,162452076,162452079,162457026 | 448385 |
| <i>Sphingomonas paucimobilis</i>                                                            | 1  | 124271054                                                                                           | 13689  |
| <i>Sphingomonas wittichii</i> RW1                                                           | 2  | 148553127,148553717                                                                                 | 392499 |
| <i>Staphylococcus aureus</i> subsp. <i>aureus</i> MSSA476                                   | 1  | 49484950                                                                                            | 282459 |
| <i>Staphylococcus epidermidis</i> RP62A                                                     | 1  | 57865917                                                                                            | 176279 |
| <i>Staphylococcus hominis</i>                                                               | 1  | 18148891                                                                                            | 1290   |
| <i>Stigmatella aurantiaca</i> DW4/3-1                                                       | 2  | 115373543,115377374                                                                                 | 378806 |
| <i>Streptococcus infantarius</i> subsp. <i>infantarius</i> ATCC BAA-102                     | 1  | 171779053                                                                                           | 471872 |
| <i>Streptococcus thermophilus</i>                                                           | 1  | 46019823                                                                                            | 1308   |
| <i>Streptomyces avermitilis</i> MA-4680                                                     | 4  | 29831850,29831852,29832255,29832256                                                                 | 227882 |
| <i>Streptomyces coelicolor</i> A3(2)                                                        | 10 | 21218854,21221060,21223014,21223642,21223646,21223984,21223993,21224291,21224333,32141178           | 100226 |
| <i>Streptomyces griseus</i> subsp. <i>griseus</i> NBRC 13350                                | 4  | 182435847,182438868,182439560,182439561                                                             | 455632 |
| <i>Sulfurovum</i> sp. <i>NBC37-1</i>                                                        | 7  | 152993685,152993686,152993687,152993688,152993690,152993691,152993693                               | 387093 |
| <i>Synechococcus</i> sp. <i>JA-2-3B'a(2-13)</i>                                             | 1  | 86609036                                                                                            | 321332 |
| <i>Synechococcus</i> sp. <i>JA-3-3Ab</i>                                                    | 1  | 86606719                                                                                            | 321327 |
| <i>Synechococcus</i> sp. <i>WH 5701</i>                                                     | 3  | 87302369,87302373,87302395                                                                          | 69042  |
| <i>Synechocystis</i> sp. <i>PCC 6803</i>                                                    | 1  | 16332137                                                                                            | 1148   |
| <i>Syntrophobacter fumaroxidans</i> MPOB                                                    | 1  | 116748530                                                                                           | 335543 |
| <i>Syntrophomonas wolfei</i> subsp. <i>wolfei</i> str. <i>Goettingen</i>                    | 1  | 114567777                                                                                           | 335541 |
| <i>Syntrophus aciditrophicus</i> SB                                                         | 2  | 85858750,85859890                                                                                   | 56780  |
| <i>Thaueria</i> sp. <i>MZ1T</i>                                                             | 4  | 169181897,169181955,169182364,169184392                                                             | 85643  |
| <i>Thermobifida fusca</i> YX                                                                | 1  | 72161132                                                                                            | 269800 |
| <i>Thermosynechococcus elongatus</i> BP-1                                                   | 1  | 22299003                                                                                            | 197221 |

|                                                               |   |                     |        |
|---------------------------------------------------------------|---|---------------------|--------|
| <i>Thiomicrospira crunogena</i> XCL-2                         | 1 | 78484711            | 317025 |
| <i>Treponema denticola</i> ATCC 35405                         | 2 | 42527126,42527322   | 243275 |
| <i>Trichodesmium erythraeum</i> IMS101                        | 1 | 113477673           | 203124 |
| uncultured bacterium                                          | 1 | 119029680           | 77133  |
| <i>Verrucomicrobium spinosum</i> DSM 4136                     | 2 | 171915047,171915063 | 240016 |
| <i>Vibrio angustum</i> S14                                    | 1 | 90580561            | 314292 |
| <i>Vibrio cholerae</i> 623-39                                 | 1 | 153829970           | 417397 |
| <i>Vibrio cholerae</i> MZO-2                                  | 1 | 153824424           | 417398 |
| <i>Vibrio parahaemolyticus</i> RIMD 2210633                   | 1 | 28898586            | 223926 |
| <i>Vibrio</i> sp. Ex25                                        | 1 | 116186391           | 150340 |
| <i>Vibrio</i> sp. MED222                                      | 1 | 86148091            | 314290 |
| <i>Vibrio vulnificus</i> YJ016                                | 1 | 37680110            | 196600 |
| <i>Xanthobacter autotrophicus</i> Py2                         | 1 | 154243756           | 78245  |
| <i>Xanthomonas axonopodis</i> pv. <i>citri</i> str. 306       | 1 | 21244022            | 190486 |
| <i>Xanthomonas campestris</i> pv. <i>campestris</i> str. 8004 | 1 | 66571812            | 314565 |
| <i>Yersinia pestis</i> KIM                                    | 1 | 22126310            | 187410 |
| <i>Yersinia pseudotuberculosis</i>                            | 1 | 49658892            | 633    |
| <i>Yersinia pseudotuberculosis</i> IP 31758                   | 2 | 153947653,153948345 | 349747 |
| <i>Yersinia pseudotuberculosis</i> YPIII                      | 2 | 170024518,170025361 | 502800 |
| <i>Zymomonas mobilis</i> subsp. <i>mobilis</i> ZM4            | 1 | 56552485            | 264203 |

---

Members of the normal human gut microbiota are labeled in red.
