# Supplementary material
Source: PubMed Central journal article supplement (PMC3085110)
Supplement: NIHMS260689-supplement-02.pdf [file NIHMS260689-supplement-02.pdf]

**Supplementary table 2.**

List of TIR domain-containing proteins in human gut, global ocean, and soil metagenomes.

| Metagenomes          | TIR-containing protein count | Protein Identifier                     |
|----------------------|------------------------------|----------------------------------------|
| Human Gut Metagenome | 25                           | F1-S_039I18.z_B_pred_1+_1_645_0_P      |
|                      |                              | F1-S_102M16.b_A_pred_2+_23_382_0_C     |
|                      |                              | F1-S_104F14.b_B_pred_1_-_32_595_0_C    |
|                      |                              | F1-S_10819.1_B_pred_2+_342_1100_0_C    |
|                      |                              | F1-S_108B19.z_A_pred_1_-_198_761_0_C   |
|                      |                              | F1-S_5032.1_B_pred_1_-_245_664_0_C     |
|                      |                              | F1-T_12357.1_A_pred_1+_90_937_0_P      |
|                      |                              | F1-T_638.1_B_pred_1_-_1_994_0_P        |
|                      |                              | F1-U_300.1_B_pred_3+_2319_3131_0_C     |
|                      |                              | F2-V_15934.1_B_pred_1_-_1_694_0_P      |
|                      |                              | F2-W_080E19.b_B_pred_2_-_380_802_0_C   |
|                      |                              | F2-W_9269.1_B_pred_2_-_279_1163_0_C    |
|                      |                              | F2-X_1575.1_B_pred_1_-_581_2095_0_C    |
|                      |                              | F2-X_66.1_B_pred_7+_3696_4451_0_C      |
|                      |                              | F2-X_66.1_B_pred_9+_5096_5620_0_C      |
|                      |                              | F2-X_8349.1_B_pred_3+_950_1376_0_P     |
|                      |                              | F2-X_8505.1_B_pred_2+_160_882_0_C      |
|                      |                              | In-D_096I18.b_B_pred_1_-_1_699_0_P     |
|                      |                              | In-D_11142.1_B_pred_2+_303_1420_0_P    |
|                      |                              | In-E_520.1_B_pred_2+_475_2292_0_C      |
|                      |                              | In-M_110.1_B_pred_18_-_11422_12222_0_C |
|                      |                              | In-R_064M11.y_B_pred_2+_388_906_0_C    |
|                      |                              | In-R_13718.1_B_pred_1_-_1_728_0_P      |
|                      |                              | In-R_3980.1_B_pred_2+_425_1461_0_P     |
|                      |                              | 2004014978                             |
| Ocean Metagenome     | 41                           | JCVI_PEP_1096667165043                 |
|                      |                              | JCVI_PEP_1096667845957                 |
|                      |                              | JCVI_PEP_1096668634683                 |
|                      |                              | JCVI_PEP_1096669356579                 |
|                      |                              | JCVI_PEP_1096669566879                 |
|                      |                              | JCVI_PEP_1096670235747                 |
|                      |                              | JCVI_PEP_1096671837417                 |
|                      |                              | JCVI_PEP_1096672015847                 |
|                      |                              | JCVI_PEP_1096672996939                 |
|                      |                              | JCVI_PEP_1096673112283                 |
|                      |                              | JCVI_PEP_1096673457197                 |
|                      |                              | JCVI_PEP_1096673599499                 |

JCVI\_PEP\_1096674374033  
JCVI\_PEP\_1096674522241  
JCVI\_PEP\_1096674669479  
JCVI\_PEP\_1096674765359  
JCVI\_PEP\_1096675669309  
JCVI\_PEP\_1096675951083  
JCVI\_PEP\_1096676030755  
JCVI\_PEP\_1096676098241  
JCVI\_PEP\_1096676569255  
JCVI\_PEP\_1096676827045  
JCVI\_PEP\_1096678914219  
JCVI\_PEP\_1096680102977  
JCVI\_PEP\_1096680979137  
JCVI\_PEP\_1096683152461  
JCVI\_PEP\_1096683544267  
JCVI\_PEP\_1096683744803  
JCVI\_PEP\_1096687324053  
JCVI\_PEP\_1096689578279  
JCVI\_PEP\_1096690729741  
JCVI\_PEP\_1096692760189  
JCVI\_PEP\_1096693153879  
JCVI\_PEP\_1096693296555  
JCVI\_PEP\_1096693530671  
JCVI\_PEP\_1096693625937  
JCVI\_PEP\_1096694680189  
JCVI\_PEP\_1096697581951  
JCVI\_PEP\_1096699084965  
JCVI\_PEP\_1096699276439  
JCVI\_PEP\_1096700751183

---

Soil Metagenome

53

2001217237  
2001220422  
2001224624  
2001232177  
2001232786  
2001240305  
2001241331  
2001241496  
2001241648  
2001241959  
2001244178  
2001246867  
2001251158

2001256366  
2001256893  
2001258672  
2001259661  
2001261414  
2001261537  
2001261608  
2001262093  
2001264543  
2001268506  
2001271595  
2001273035  
2001280584  
2001287516  
2001289545  
2001290801  
2001295392  
2001298186  
2001299857  
2001329879  
2001331304  
2001331886  
2001332481  
2001333399  
2001334733  
2001340292  
2001351234  
2001355715  
2001357051  
2001358251  
2001358424  
2001358586  
2001362992  
2001363026  
2001369953  
2001374162  
2001381169  
2001381600  
2001382230  
2001382274

---
